# Supplementary material
Source: MDPI journal article supplement (https://www.mdpi.com/2073-4441/15/19/3510)
Supplement: s1 [file s1]

## Supplementary File

### The Relationship between L-Moments and LH-Moments

Relations for LH-moments [16]:

$$L_1^\eta = E \left[ X_{(\eta+1):(\eta+1)} \right]$$

$$L_2^\eta = \frac{1}{2} \cdot E \left[ X_{(\eta+2):(\eta+2)} - X_{(\eta+1):(\eta+2)} \right]$$

$$L_3^\eta = \frac{1}{3} \cdot E \left[ X_{(\eta+3):(\eta+3)} - 2 \cdot X_{(\eta+2):(\eta+3)} + X_{(\eta+1):(\eta+3)} \right]$$

$$L_4^\eta = \frac{1}{4} \cdot E \left[ X_{(\eta+4):(\eta+4)} - 3 \cdot X_{(\eta+3):(\eta+4)} + 3 \cdot X_{(\eta+2):(\eta+4)} - X_{(\eta+1):(\eta+4)} \right]$$

where  $\eta = 0, 1, 2, 3, \dots$ . For  $\eta = 0$ , the method is identical to the L-moments method.

Based on these LH-moments, the statistical indicators are:

$$\tau_{H2} = \frac{L_2^\eta}{L_1^\eta} - \text{represents coefficient of LH-variation}$$

$$\tau_{H3} = \frac{L_3^\eta}{L_2^\eta} - \text{represents LH-skewness}$$

$$\tau_{H4} = \frac{L_4^\eta}{L_2^\eta} - \text{represents LH-kurtosis}$$

The relations between the high-order linear moments and the normalized weighted moments are the following:

$$L_1^\eta = B_\eta$$

$$L_2^\eta = \frac{(\eta+2)}{2} \cdot (B_{\eta+1} - B_\eta)$$

$$L_3^\eta = \frac{(\eta+3)}{6} \cdot ((\eta+4) \cdot B_{\eta+2} - 2 \cdot (\eta+3) \cdot B_{\eta+1} + (\eta+2) \cdot B_\eta)$$

$$L_4^\eta = \frac{(\eta+4)}{24} \cdot \left( (\eta+6) \cdot (\eta+5) \cdot B_{\eta+3} - 3 \cdot (\eta+5) \cdot (\eta+4) \cdot B_{\eta+2} + \right. \\ \left. 3 \cdot (\eta+4) \cdot (\eta+3) \cdot B_{\eta+1} - (\eta+3) \cdot (\eta+2) \cdot B_\eta \right)$$

where  $B_\eta = (\eta+1) \cdot b_\eta$  and  $b_\eta$  represent the natural estimators expressed by the L-moments method. For  $\eta = 0$ , the method become the L-moments method.

### The second LH-moments for the GEV, W3, PG, LL3 and RY distributions

#### GEV distribution

$$L_{H1} = \gamma + \frac{\beta}{\alpha} \cdot (1 - \Gamma(1 + \alpha) \cdot 3^{-\alpha})$$

$$L_{H2} = 2 \cdot \beta \cdot \Gamma(\alpha) \cdot (3^{-\alpha} - 4^{-\alpha})$$

$$L_{H3} = \frac{5}{3} \cdot \beta \cdot \Gamma(\alpha) \cdot (5 \cdot 4^{-\alpha} - 2 \cdot 3^{-\alpha})$$

Parameter  $\alpha$  can be approximate using the next relation depending on  $\tau_{H3}$ :

$$\alpha = \frac{0.590985391 - 2.285515331 \cdot |\tau_{H3}| + 0.427911532 \cdot \tau_{H3}^2}{1 + 0.082080011 \cdot |\tau_{H3}| - 0.081733267 \cdot \tau_{H3}^2 + 0.008299996 \cdot |\tau_{H3}|^3}$$

$$\beta = \frac{L_{H2}}{2 \cdot \Gamma(\alpha) \cdot (3^{-\alpha} - 4^{-\alpha})}$$

$$\gamma = L_{H1} - \frac{\beta}{\alpha} \cdot (1 - \Gamma(1 + \alpha) \cdot 3^{-\alpha})$$

### Weibull distribution

$$L_{H1} = \gamma - \frac{\beta}{\alpha} \cdot 6^{-\frac{1}{\alpha}} \cdot \Gamma\left(\frac{1}{\alpha}\right) \cdot \left(3^{\frac{1}{\alpha}+1} - 3 \cdot 6^{\frac{1}{\alpha}} - 2^{\frac{1}{\alpha}}\right)$$

$$L_{H2} = \frac{2 \cdot \beta}{\alpha} \cdot 6^{-\frac{1}{\alpha}} \cdot \Gamma\left(\frac{1}{\alpha}\right) \cdot \left(6^{\frac{1}{\alpha}} + 3 \cdot 2^{\frac{1}{\alpha}} - 3^{\frac{1}{\alpha}} \cdot \left(2^{\frac{1}{\alpha}} + 3\right)\right)$$

$$L_{H3} = \frac{5 \cdot \beta}{3 \cdot \alpha} \cdot 6^{-\frac{1}{\alpha}} \cdot \Gamma\left(\frac{1}{\alpha}\right) \cdot \left(6^{\frac{1}{\alpha}} \cdot \left(3 \cdot 5^{\frac{1}{\alpha}} + 1\right) + 12 \cdot 2^{\frac{1}{\alpha}} - 3^{\frac{1}{\alpha}} \cdot \left(10 \cdot 2^{\frac{1}{\alpha}} + 6\right)\right)$$

Parameter  $\alpha$  can be approximate using the next relation depending on  $\tau_{H3}$ :

if  $0.1 < |\tau_{H3}| \leq 0.40$ :

$$\alpha = \frac{103.6860892 + 2130.06511762 \cdot |\tau_{H3}| + 11439.55874939 \cdot \tau_{H3}^2 - 62374.50744931 \cdot |\tau_{H3}|^3 + 173468.49718504 \cdot \tau_{H3}^4 - 267472.87702451 \cdot |\tau_{H3}|^5 + 166118.74442011 \cdot \tau_{H3}^6}{1 - 15.29830556 \cdot |\tau_{H3}| + 10893.19365376 \cdot \tau_{H3}^2}$$

If  $0.40 < |\tau_{H3}| < 0.83$ :

$$\alpha = \frac{7.52721198 - 51.23777768 \cdot |\tau_{H3}| + 166.95004129 \cdot \tau_{H3}^2 - 297.93483838 \cdot |\tau_{H3}|^3 + 288.77916443 \cdot \tau_{H3}^4 - 135.39865923 \cdot |\tau_{H3}|^5 + 20.62550348 \cdot \tau_{H3}^6}{1 - 15.29830556 \cdot |\tau_{H3}| + 10893.19365376 \cdot \tau_{H3}^2}$$

$$\beta = \frac{L_{H2} \cdot \alpha}{2 \cdot 6^{-\frac{1}{\alpha}} \cdot \Gamma\left(\frac{1}{\alpha}\right) \cdot \left(6^{\frac{1}{\alpha}} + 3 \cdot 2^{\frac{1}{\alpha}} - 3^{\frac{1}{\alpha}} \cdot \left(2^{\frac{1}{\alpha}} + 3\right)\right)}$$

$$\gamma = L_{H1} + \frac{\beta}{\alpha} \cdot 6^{-\frac{1}{\alpha}} \cdot \Gamma\left(\frac{1}{\alpha}\right) \cdot \left(3^{\frac{1}{\alpha}+1} - 3 \cdot 6^{\frac{1}{\alpha}} - 2^{\frac{1}{\alpha}}\right)$$

### Generalized Pareto

For the second order LH-moments, the parameters have the following expressions:

$$\alpha = \frac{5 - 15 \cdot |\tau_{H3}|}{3 \cdot |\tau_{H3}| + 5}$$

$$\beta = \frac{L_{H2}}{12} \cdot (\alpha + 1) \cdot (\alpha + 2) \cdot (\alpha + 3) \cdot (\alpha + 4)$$

$$\gamma = L_{H1} - \frac{\beta \cdot (\alpha^2 + 6 \cdot \alpha + 11)}{(\alpha + 1) \cdot (\alpha + 2) \cdot (\alpha + 3)}$$

### Log-logistic

For the second order LH-moments, the parameters have the following expressions:

$$\alpha = \frac{15}{24 \cdot \tau_{H3} - 5}$$

$$\beta = \frac{3 \cdot L_{H2} \cdot \alpha^4 \cdot \sin\left(\frac{\pi}{\alpha}\right)}{\pi \cdot (\alpha + 1) \cdot (2 \cdot \alpha + 1)}$$

$$\gamma = L_{H1} - \frac{\beta \cdot \pi \cdot (\alpha + 1) \cdot (2 \cdot \alpha + 1)}{2 \cdot \alpha^3 \cdot \sin\left(\frac{\pi}{\alpha}\right)}$$

### Rayleigh

For the second order LH-moments, the parameters have the following expressions:

$$\alpha = \frac{\sqrt{\pi} \cdot (6 \cdot L_{H3} \cdot |\tau_{H3}| - 2 \cdot L_{H2})}{\pi \cdot (3 \cdot \sqrt{10} + 18 \cdot \sqrt{6} - 21 \cdot \sqrt{2} - 24)}$$

$$\beta = L_{H2} - \frac{\alpha \cdot \pi \cdot (2 \cdot \sqrt{6} + \sqrt{2} - 6)}{2 \cdot \sqrt{\pi}}$$

$$\gamma = \frac{\sqrt{\pi} \cdot (6 \cdot L_{H1} - 22 \cdot \beta) + \alpha \cdot \pi \cdot (9 - 9 \cdot \sqrt{2} - \sqrt{6})}{6 \cdot \sqrt{\pi}}$$

**The frequency factors for the PE3, GEV, W3, GP, RY, LN3 and LL3 distributions.**

Table S1 shows the frequency factors for the analyzed distributions.

**Table S1.** Frequency factors.

| Distr. | Frequency factor, $K_p(p)$                                                                                                                                                     |                                                                                                                                                                                                                                                                               |
|--------|--------------------------------------------------------------------------------------------------------------------------------------------------------------------------------|-------------------------------------------------------------------------------------------------------------------------------------------------------------------------------------------------------------------------------------------------------------------------------|
|        | Quantile function                                                                                                                                                              |                                                                                                                                                                                                                                                                               |
|        | L-moments                                                                                                                                                                      | LH-moments                                                                                                                                                                                                                                                                    |
|        | $x(p) = L_1 + L_2 \cdot K_p(p)$                                                                                                                                                | $x(p) = L_{H1} + L_{H2} \cdot K_p(p)$                                                                                                                                                                                                                                         |
| PE3    | $\frac{\Gamma(\alpha) \cdot \sqrt{\pi} \cdot (qgamma(1-p, \alpha) - \alpha)}{\Gamma(\alpha + 0.5)}$                                                                            | $\frac{\frac{2}{3} \cdot (qgamma(1-p, \alpha) - 2 \cdot z_2)}{z_1}$<br>the expressions for $z_1$ and $z_2$ can be found in<br>Appendix                                                                                                                                        |
| GEV    | $\frac{1}{1-2^{-\alpha}} \cdot \left( 1 - \frac{(-\ln(1-p))^\alpha}{\Gamma(\alpha+1)} \right)$                                                                                 | $\frac{\Gamma(\alpha+1) \cdot 2^{1-\alpha} - 2 \cdot (-\ln(1-p))^\alpha}{\Gamma(\alpha+1) \cdot (3 \cdot 2^{-\alpha} - 3^{1-\alpha})}$                                                                                                                                        |
| W3     | $\frac{1}{1-2^{-\frac{1}{\alpha}}} \cdot \left( \frac{\ln\left(\frac{1}{p}\right)^{\frac{1}{\alpha}}}{\frac{1}{\alpha} \cdot \Gamma\left(\frac{1}{\alpha}\right)} - 1 \right)$ | $\frac{2 \cdot \alpha \cdot (-\ln(p))^{\frac{1}{\alpha}} + \Gamma\left(\frac{1}{\alpha}\right) \cdot \left( 2^{\frac{1}{\alpha}} - 4 \right)}{\Gamma\left(\frac{1}{\alpha}\right) \cdot \left( 3^{\frac{1}{\alpha}} + 3 - 3 \cdot 2^{\frac{1}{\alpha}} \right)}$              |
| GP     | $1 + \frac{2}{\alpha} \cdot (1 - p^\alpha) - p^\alpha \cdot (\alpha + 3)$                                                                                                      | $\frac{(\alpha + 3) \cdot (2 - p^\alpha \cdot (\alpha^2 + 3 \cdot \alpha + 2))}{3 \cdot \alpha}$                                                                                                                                                                              |
| RY     | $\frac{\alpha \cdot (2 \cdot \sqrt{-2 \cdot \ln(p)} - \sqrt{\pi}) - \beta \cdot (4 \cdot \ln(p) + 2)}{\alpha \cdot (\sqrt{2 \cdot \pi} - \sqrt{\pi}) + 2 \cdot \beta} - 1$     | $\frac{4 \cdot \alpha \cdot \sqrt{-2 \cdot \pi \cdot \ln(p)} + 2 \cdot \alpha \cdot \pi \cdot (1 - 2 \cdot \sqrt{2}) - \sqrt{\pi} \cdot 4 \cdot \beta \cdot (1 \cdot \ln(p) + 3)}{\alpha \cdot \pi \cdot (\sqrt{6} + 3 \cdot \sqrt{2} - 6) + 4 \cdot \beta \cdot \sqrt{\pi}}$ |
| LN3    | $\frac{\exp(\alpha + \beta \cdot qnorm(1-p, 0, 1)) - \exp(\alpha + 0.5 \cdot \beta^2)}{erf(0.5 \cdot \beta) \cdot \exp(0.5 \cdot \beta^2 + \alpha)}$                           | $\frac{\exp(\beta \cdot qnorm(1-p, 0, 1)) - 2 \cdot z_2}{\frac{3}{2} \cdot z_1}$<br>the expressions for $z_1$ and $z_2$ can be found in<br>Appendix A                                                                                                                         |
| LL3    | $\frac{\alpha^2 \cdot \sin\left(\frac{\pi}{\alpha}\right) \cdot \left(\frac{1-p}{p}\right)^{\frac{1}{\alpha}}}{\pi}$                                                           | $\frac{4 \cdot \alpha}{3} \cdot \left( \frac{\alpha^2 \cdot \sin\left(\frac{\pi}{\alpha}\right) \cdot \left(\frac{1}{p} - 1\right)^{\frac{1}{\alpha}}}{\pi \cdot (\alpha + 1)} - 1 \right)$                                                                                   |

### Frequency Factor approximation for PE3

The frequency factor for L-moments was presented in previous materials [18].

The frequency factor for LH-moments can be estimated using a polynomial function:

$$K_p(p) = a + b \cdot \tau_{H3} + c \cdot \tau_{H3}^2 + d \cdot \tau_{H3}^3 + e \cdot \tau_{H3}^4 + f \cdot \tau_{H3}^5 + g \cdot \tau_{H3}^6$$

**Table S2.** The frequency factor with LH-moments for Pearson III.

| P (%) | a         | b           | c           | d            | e            | f             | g           |
|-------|-----------|-------------|-------------|--------------|--------------|---------------|-------------|
| 0.01  | 138.44539 | -2465.14034 | 17892.31211 | -63752.69124 | 120214.51108 | -114563.99245 | 43558.796   |
| 0.1   | 52.68673  | -889.81398  | 6536.44619  | -23385.63059 | 44343.20937  | -42529.19337  | 16305.20832 |
| 0.5   | 8.52826   | -84.40503   | 710.04423   | -2635.33211  | 5249.29588   | -5311.16131   | 2175.4185   |
| 1     | -2.62796  | 115.73984   | -752.64855  | 2601.15231   | -4681.31813  | 4213.76135    | -1475.06545 |
| 2     | -6.49475  | 179.9173    | -1244.96492 | 4403.95283   | -8196.90419  | 7690.84016    | -2858.81404 |
| 3     | -4.98987  | 146.97555   | -1028.60893 | 3668.77984   | -6898.55322  | 6550.0621     | -2473.13407 |
| 5     | -0.39881  | 54.15976    | -384.55056  | 1408.41202   | -2727.0609   | 2675.45124    | -1052.85277 |
| 10    | 3.52157   | -33.04936   | 230.56841   | -804.89751   | 1478.44535   | -1366.32017   | 491.25432   |
| 20    | 0.60222   | 2.42114     | -26.15596   | 73.87246     | -93.86151    | 27.90766      | 16.29371    |
| 40    | -0.52763  | -1.56858    | -6.0962     | 38.24575     | -109.57418   | 142.81235     | -65.69078   |
| 50    | -0.86623  | -7.33884    | 41.89976    | -140.83664   | 240.56122    | -191.21672    | 56.246      |
| 80    | -3.96106  | 8.18313     | -33.00426   | 110.27596    | -184.78442   | 147.26491     | -45.41378   |
| 90    | -5.11846  | 6.75273     | 1.21902     | 17.21686     | -89.74482    | 117.26047     | -49.41254   |

**Frequency Factor approximation for LN3**

The frequency factor for L-moments can be estimated using a rational function:

$$K_p(p) = \frac{a + b \cdot \tau_3 + c \cdot \tau_3^2 + d \cdot \tau_3^3 + e \cdot \tau_3^4 + f \cdot \tau_3^5 + g \cdot \tau_3^6}{1 + h \cdot \tau_3 + i \cdot \tau_3^2 + j \cdot \tau_3^3}$$

**Table S3.** The frequency factor for Log-normal.

| P (%) | a          | b           | c           | d           | e            | f            | g            | h           | i            |
|-------|------------|-------------|-------------|-------------|--------------|--------------|--------------|-------------|--------------|
| 0.01  | 7.34577    | -11.93543   | 716.47126   | -4366.76433 | 13233.45376  | -17502.29426 | 9087.37090   | 0.13890     | -0.31483     |
| 0.1   | -182.88539 | 80948.57367 | 69705.91443 | 29162.82665 | -47509.61155 | -40863.74927 | -86394.58129 | 13007.97382 | -22817.93119 |
| 0.5   | 4.46079    | 768.03648   | 392.38804   | 2614.73022  | -5453.94909  | 4471.71101   | -2769.46863  | 161.69088   | -188.52368   |
| 1     | 5.05392    | 3381.94490  | 4190.83018  | 1683.11151  | -4342.06310  | -1032.28092  | -3834.14862  | 828.61007   | -638.47665   |
| 2     | 3.72540    | 559.11509   | 678.67334   | 283.47264   | -1231.65344  | 218.68686    | -530.59615   | 152.94462   | -60.42997    |
| 3     | 3.34676    | 268.95983   | 249.09931   | 62.99081    | -578.86038   | 94.48113     | -119.72659   | 79.34274    | -32.25046    |
| 5     | 2.90555    | 3.51178     | -4.44349    | 21.53572    | -56.29603    | 59.07715     | -27.31915    | -0.00055    | 0.00201      |
| 10    | 2.27392    | 10.31129    | 0.12209     | -25.46670   | 15.97668     | -30.11238    | 26.69439     | 4.08106     | -2.17704     |
| 20    | 1.47852    | 1457.84690  | -918.40881  | -2278.41631 | -529.77821   | 2130.23329   | -102.47085   | 977.02214   | -257.24175   |
| 40    | 0.44943    | -1.71341    | -0.58245    | -0.17569    | 2.15788      | -1.99608     | 0.85851      | -           | -            |
| 50    | -0.00005   | -1.81172    | -0.02237    | 0.94326     | -0.20718     | 0.17417      | -0.07598     | -           | -            |
| 80    | -1.49191   | -0.52177    | 1.78568     | -0.41759    | -0.93231     | 0.93656      | -0.35804     | -           | -            |
| 90    | -2.27165   | 1.17186     | 1.28540     | -1.61220    | 0.18629      | 0.49903      | -0.25817     | -           | -            |

The frequency factor for LH-moments can be estimated using a polynomial function:

$$K_p(p) = a + b \cdot \tau_{H3} + c \cdot \tau_{H3}^2 + d \cdot \tau_{H3}^3 + e \cdot \tau_{H3}^4$$

**Table S4.** The frequency factor for estimation with LH-moments for Log-normal.

| P (%) | a          | b         | c         | d         |
|-------|------------|-----------|-----------|-----------|
| 0.01  | 20.4560566 | 0.0157214 | 7.6751191 | 0.1690430 |
| 0.1   | 19.9223136 | 0.0157565 | 7.7306869 | 0.1694185 |
| 0.5   | 19.4863608 | 0.0157853 | 7.7760593 | 0.1697253 |
| 1     | 19.2751529 | 0.0157992 | 7.7980364 | 0.1698740 |
| 2     | 19.0445424 | 0.0158144 | 7.8220289 | 0.1700363 |
| 3     | 18.8983187 | 0.0158240 | 7.8372399 | 0.1701393 |
| 5     | 18.6989591 | 0.0158372 | 7.8579761 | 0.1702796 |
| 10    | 18.3922410 | 0.0158574 | 7.8898737 | 0.1704956 |
| 20    | 18.0212465 | 0.0158819 | 7.9284472 | 0.1707569 |
| 40    | 17.5258663 | 0.0159145 | 7.9799386 | 0.1711059 |
| 50    | 17.3127762 | 0.0159286 | 8.0020827 | 0.1712560 |
| 80    | 16.6059721 | 0.0159752 | 8.0755103 | 0.1717541 |
| 90    | 16.2371749 | 0.0159996 | 8.1138096 | 0.1720141 |

**Frequency Factor approximation for the Log-logistic**

The frequency factor for L-moments was presented in previous materials [43].

The frequency factor for LH-moments can be estimated using a polynomial function:

$$K_p(p) = a + b \cdot \tau_{H3} + c \cdot \tau_{H3}^2 + d \cdot \tau_{H3}^3 + e \cdot \tau_{H3}^4 + f \cdot \tau_{H3}^5 + g \cdot \tau_{H3}^6 + h \cdot \tau_{H3}^7$$

**Table S5.** The frequency factor for estimation with LH-moments for Log-logistic.

| P (%) | a         | b           | c           | d             | e            | f             | g            | h             |
|-------|-----------|-------------|-------------|---------------|--------------|---------------|--------------|---------------|
| 0.01  | 103.44298 | -2247.27189 | 21184.43377 | -102767.75773 | 286457.93986 | -457461.25129 | 395262.37012 | -142770.31432 |
| 0.1   | 6.05545   | -17.08849   | 343.77445   | -1533.35095   | 4753.01020   | -8113.84196   | 7880.40650   | -3509.19037   |
| 0.5   | 3.87086   | 11.61429    | -5.07346    | 105.17812     | -250.39810   | 371.84638     | -323.25044   | 54.78038      |
| 1     | 3.51568   | 8.09347     | -1.16064    | 48.37422      | -135.48438   | 202.21526     | -205.45954   | 65.24658      |
| 2     | 3.07785   | 5.02904     | 0.91937     | 8.87123       | -39.66855    | 50.29374      | -61.12793    | 25.47253      |
| 3     | 2.77481   | 3.55471     | 0.40510     | -0.82946      | -14.11642    | 11.57912      | -18.50701    | 10.28746      |
| 5     | 2.34112   | 1.93904     | -0.92188    | -4.44877      | -1.80985     | -3.58268      | 2.10840      | 1.21556       |
| 10    | 1.64347   | 0.07494     | -2.24613    | -2.84378      | 0.70228      | -1.42733      | 3.02749      | -0.93766      |
| 20    | 0.75853   | -1.35636    | -1.94317    | -0.08669      | 0.71560      | 0.88025       | -0.41732     | -0.04417      |
| 40    | -0.52183  | -1.88716    | 0.21358     | 1.22206       | 0.14678      | -0.53137      | 0.04491      | 0.04564       |
| 50    | -1.12906  | -1.58048    | 1.23734     | 0.91658       | -0.49333     | -0.45291      | 0.32981      | -0.05510      |
| 80    | -3.61986  | 2.78806     | 1.59348     | -3.21610      | 1.10363      | 0.63340       | -0.59631     | 0.14058       |
| 90    | -5.43104  | 8.59806     | -4.49534    | -2.96004      | 5.88869      | -3.80245      | 1.18164      | -0.14427      |

### Frequency Factor approximation for the generalized Pareto

The frequency factor for L-moments can be estimated using a polynomial function:

$$K_p(p) = a + b \cdot \tau_3 + c \cdot \tau_3^2 + d \cdot \tau_3^3 + e \cdot \tau_3^4 + f \cdot \tau_3^5 + g \cdot \tau_3^6 + h \cdot \tau_3^7 + i \cdot \tau_3^8 + j \cdot \tau_3^9$$

**Table S6.** The frequency factor for estimation with L-moments for generalized Pareto.

| P<br>[%] | a                       | b        | c        | d       | e        | f         | g       | h                    | i      | j     |
|----------|-------------------------|----------|----------|---------|----------|-----------|---------|----------------------|--------|-------|
| 0.01     | 2.8976                  | 16.049   | -166.33  | 2107.2  | -11711   | 41260     | -84364  | $1.0671 \times 10^5$ | -68465 | 14604 |
| 0.1      | 2.9921                  | 7.9122   | 21.160   | 46.340  | 207.03   | -394.80   | 1467.1  | -2026.5              | 667.72 | -     |
| 0.5      | 2.9751                  | 7.0733   | 21.320   | 5.3452  | 97.924   | -99.393   | -95.564 | -59.326              | -      | -     |
| 1        | 2.9389                  | 6.8741   | 14.223   | 10.895  | 33.199   | -116.24   | 47.113  | -                    | -      | -     |
| 2        | 2.8667                  | 6.5598   | 3.8790   | 28.740  | -66.614  | 23.564    | -       | -                    | -      | -     |
| 3        | 2.8214                  | 5.3368   | 6.0252   | 1.9543  | -31.305  | 14.174    | -       | -                    | -      | -     |
| 5        | 2.7060                  | 3.9951   | 4.1471   | -13.220 | -2.6956  | 4.0738    | -       | -                    | -      | -     |
| 10       | 2.4017                  | 2.0082   | -1.6983  | -9.9252 | 7.8868   | -1.6725   | -       | -                    | -      | -     |
| 20       | 1.7989                  | -0.48676 | -4.2616  | 1.0072  | 1.7490   | -0.80770  | -       | -                    | -      | -     |
| 40       | 0.60025                 | -2.4049  | -0.31267 | 2.3727  | -1.6966  | 0.44147   | -       | -                    | -      | -     |
| 50       | $3.8891 \times 10^{-4}$ | -2.3323  | 1.3905   | 0.48092 | -0.81390 | 0.27475   | -       | -                    | -      | -     |
| 80       | -1.8003                 | 0.52569  | 1.0120   | -1.3741 | 0.86642  | -0.22985  | -       | -                    | -      | -     |
| 90       | -2.4001                 | 2.1286   | -0.96924 | 0.23252 | 0.041754 | -0.033573 | -       | -                    | -      | -     |

The frequency factor for LH-moments can be estimated using a polynomial function:

$$K_p(p) = a + b \cdot \tau_{H3} + c \cdot \tau_{H3}^2 + d \cdot \tau_{H3}^3 + e \cdot \tau_{H3}^4 + f \cdot \tau_{H3}^5 + g \cdot \tau_{H3}^6 + h \cdot \tau_{H3}^7$$

**Table S7.** The frequency factor for generalized Pareto.

| P<br>[%] | a         | b           | c           | d             | e            | f             | g            | h             |
|----------|-----------|-------------|-------------|---------------|--------------|---------------|--------------|---------------|
| 0.01     | 127.52653 | -3133.26097 | 31256.43005 | -160882.76618 | 469519.36329 | -784121.48421 | 705520.62434 | -264098.50757 |
| 0.1      | 0.55226   | 54.02709    | -427.81690  | 2197.50726    | -5596.20281  | 8171.75165    | -5057.70040  | 311.34905     |
| 0.5      | 2.34460   | 9.04692     | -14.93090   | 179.80355     | -485.14463   | 927.92082     | -1044.44624  | 378.98343     |
| 1        | 2.41429   | 5.30752     | 13.10852    | -3.39848      | 23.00815     | -41.46804     | -82.23960    | 63.19792      |
| 2        | 2.31029   | 4.32307     | 8.11442     | -15.24676     | 30.86405     | -97.92152     | 70.31997     | -11.84745     |
| 3        | 2.20245   | 3.65301     | 3.16849     | -9.16777      | 1.48768      | -38.28013     | 42.42756     | -11.40870     |
| 5        | 1.99879   | 2.34790     | -1.34216    | -5.66879      | -11.06583    | 8.20383       | 4.87852      | -2.99898      |
| 10       | 1.49986   | -0.06541    | -3.98153    | -3.59998      | 1.16450      | 6.91929       | -5.25572     | 1.14932       |
| 20       | 0.50011   | -2.35085    | -2.38207    | 2.08504       | 2.85979      | -3.34721      | 1.24717      | -0.16166      |
| 40       | -1.50002  | -1.91397    | 2.77403     | 0.48191       | -2.27210     | 1.60762       | -0.54501     | 0.07843       |
| 50       | -2.49995  | -0.17790    | 3.21866     | -2.18282      | -0.07344     | 0.89937       | -0.54893     | 0.12201       |
| 80       | -5.50006  | 8.93496     | -7.45062    | 3.83533       | -1.00503     | -0.18694      | 0.26476      | -0.07197      |
| 90       | -6.49988  | 12.96321    | -14.95610   | 12.89808      | -8.97451     | 4.87628       | -1.80348     | 0.32790       |

### Estimation of the Frequency Factor for the GEV Distribution

The frequency factor for L-moments can be estimated using a rational function:

$$K_p(p) = \frac{a + b \cdot \tau_3}{1 + c \cdot \tau_3 + d \cdot \tau_3^2 + e \cdot \tau_3^3 + f \cdot \tau_3^4 + g \cdot \tau_3^5 + h \cdot \tau_3^6}$$

**Table S8.** The frequency factor for GEV.

| P<br>[%] | a         | b          | c          | d           | e          | f         | g           | h          |
|----------|-----------|------------|------------|-------------|------------|-----------|-------------|------------|
| 0.01     | 43.997278 | 479.223151 | 112.991079 | -478.513693 | 606.212296 | 38.131031 | -574.431973 | 297.600956 |
| 0.1      | 4.593731  | -4.599738  | -4.914425  | 10.573881   | -12.418413 | 8.168773  | -2.751896   | 0.346790   |
| 0.5      | 4.231408  | -4.256125  | -3.710814  | 5.637548    | -3.209217  | -1.415680 | 2.689191    | -0.969345  |
| 1        | 3.920710  | -3.964687  | -3.310486  | 4.702659    | -2.639564  | -0.980350 | 2.004350    | -0.734317  |
| 2        | 3.547981  | -3.630077  | -2.865169  | 3.767118    | -2.103467  | -0.588628 | 1.400705    | -0.529414  |
| 3        | 3.292962  | -3.411972  | -2.581338  | 3.224279    | -1.787497  | -0.424176 | 1.119925    | -0.432908  |
| 5        | 2.923725  | -3.114144  | -2.195436  | 2.551143    | -1.361430  | -0.354604 | 0.909776    | -0.359544  |
| 10       | 2.315824  | -2.678716  | -1.614374  | 1.717971    | -0.883351  | -0.220842 | 0.613879    | -0.250675  |
| 20       | 1.535444  | -2.240652  | -0.939149  | 1.018412    | -0.488547  | -0.071811 | 0.312582    | -0.126376  |
| 40       | 0.458641  | -1.897210  | -0.076185  | 0.410230    | 0.142966   | -0.058015 | -0.064798   | 0.084806   |
| 50       | -0.006962 | -1.848988  | 0.259172   | 0.403972    | 0.162322   | 0.002282  | -0.021729   | 0.050165   |
| 80       | -1.522088 | 0.021531   | -0.146382  | 0.914093    | -0.434557  | -0.009206 | 0.338580    | -0.162479  |
| 90       | -2.283526 | 1.292147   | 0.047707   | 0.243670    | -0.278656  | -0.068485 | 0.103177    | -0.056225  |

The frequency factor for LH-moments can be estimated using a polynomial function:

$$K_p(p) = a + b \cdot \tau_{H3} + c \cdot \tau_{H3}^2 + d \cdot \tau_{H3}^3 + e \cdot \tau_{H3}^4 + f \cdot \tau_{H3}^5 + g \cdot \tau_{H3}^6 + h \cdot \tau_{H3}^7 + i \cdot \tau_{H3}^8$$

**Table S9.** The frequency factor for estimation with LH-moments for GEV.

| P<br>[%] | a        | b        | c           | d           | e            | f            | g             | h            | i            |
|----------|----------|----------|-------------|-------------|--------------|--------------|---------------|--------------|--------------|
| 0.01     | 2.84193  | 72.89009 | -1208.45990 | 12033.50122 | -59731.52949 | 172890.26456 | -284810.22514 | 257879.13515 | -99546.89774 |
| 0.1      | 3.55588  | 10.78712 | 43.28599    | -63.74219   | 654.48792    | -1426.75704  | 2111.74697    | -1473.53626  | -41.99786    |
| 0.5      | 3.29715  | 8.65198  | 17.23792    | 6.91346     | 61.74994     | -188.09188   | 261.35329     | -321.69357   | 121.00099    |
| 1        | 3.11233  | 7.10050  | 10.15730    | 5.05963     | -3.86343     | -30.89273    | 8.28187       | -37.80693    | 24.91187     |
| 2        | 2.85379  | 5.24293  | 4.55201     | -1.68345    | -12.14255    | -3.88219     | -13.57036     | 12.13614     | -0.39754     |
| 3        | 2.65592  | 4.04592  | 1.81490     | -4.26422    | -9.35750     | -1.59873     | -4.65570      | 8.57527      | -1.94883     |
| 5        | 2.34127  | 2.46046  | -0.91900    | -5.21299    | -4.65998     | 0.36208      | 1.67495       | 1.66347      | -0.82582     |
| 10       | 1.75396  | 0.29628  | -2.90218    | -3.14928    | 0.27245      | 1.72803      | 0.53092       | -0.60600     | 0.07431      |
| 20       | 0.88129  | -1.54098 | -2.35325    | 0.36569     | 1.53760      | -0.04081     | -0.50253      | 0.17109      | -0.01739     |
| 40       | -0.52878 | -2.10947 | 0.67009     | 1.43795     | -0.67473     | -0.31022     | 0.35590       | -0.13646     | 0.02264      |
| 50       | -1.20755 | -1.59319 | 1.78319     | 0.48349     | -1.07574     | 0.39579      | 0.04032       | -0.07752     | 0.02036      |
| 80       | -3.69179 | 3.48265  | -0.01656    | -2.24346    | 2.05403      | -0.97650     | 0.23017       | 0.00536      | -0.01228     |
| 90       | -5.09402 | 8.08189  | -6.10375    | 1.78936     | 1.25678      | -2.06800     | 1.46894       | -0.59841     | 0.11185      |



### Frequency Factor approximation for the Weibull

The frequency factor for L-moments can be estimated using a rational function:

$$K_p(p) = \frac{a + b \cdot \tau_3}{1 + c \cdot \tau_3 + d \cdot \tau_3^2 + e \cdot \tau_3^3 + f \cdot \tau_3^4 + g \cdot \tau_3^5 + h \cdot \tau_3^6}$$

**Table S10.** The frequency factor for Weibull.

| P<br>[%] | a         | b          | c         | d           | e         | f         | g          | h          |
|----------|-----------|------------|-----------|-------------|-----------|-----------|------------|------------|
| 0.01     | 3.881157  | 464.188509 | 58.471077 | -100.174864 | -6.313148 | 48.241257 | 37.515608  | -38.451757 |
| 0.1      | 5.681663  | 107.734771 | 20.530306 | -52.062588  | 39.704691 | 10.866413 | -35.950666 | 16.615265  |
| 0.5      | 4.402203  | -4.418888  | -2.804339 | 2.750395    | -0.417193 | -1.647128 | 1.673333   | -0.554708  |
| 1        | 4.017978  | -4.034465  | -2.569301 | 1.977775    | 1.173936  | -3.951053 | 3.515693   | -1.145162  |
| 2        | 3.583439  | -3.605303  | -2.312332 | 1.228444    | 2.780465  | -6.579336 | 5.845979   | -1.955337  |
| 3        | 3.300340  | -3.332600  | -2.155135 | 0.881847    | 3.445384  | -7.817715 | 7.101007   | -2.437017  |
| 5        | 2.905854  | -2.974573  | -1.956442 | 0.684947    | 3.395098  | -7.883958 | 7.475747   | -2.660926  |
| 10       | 2.282379  | -2.510781  | -1.716588 | 1.326785    | -0.514585 | -0.274260 | 0.595009   | -0.203138  |
| 20       | 1.523802  | -2.118413  | -1.196587 | 0.505068    | 0.569479  | -0.584168 | -0.588348  | 0.876540   |
| 40       | 0.468701  | -1.845141  | -0.577517 | 0.879178    | -0.785897 | 0.131841  | 0.981618   | -0.254152  |
| 50       | 0.006103  | -1.802922  | -0.486914 | 1.766501    | -2.057441 | 0.362834  | 2.720117   | -1.511934  |
| 80       | -1.537064 | -0.149812  | -0.375924 | 1.427798    | -0.410872 | 0.163424  | 0.347573   | -0.479485  |
| 90       | -2.317176 | 1.317548   | -0.064713 | 0.721028    | -0.028389 | -0.602600 | -0.461070  | 0.429757   |

The frequency factor for LH-moments can be estimated using a polynomial function:

$$K_p(p) = a + b \cdot \tau_{H3} + c \cdot \tau_{H3}^2 + d \cdot \tau_{H3}^3 + e \cdot \tau_{H3}^4 + f \cdot \tau_{H3}^5 + g \cdot \tau_{H3}^6 + h \cdot \tau_{H3}^7 + i \cdot \tau_{H3}^8$$

**Table S11.** The frequency factor for estimation with LH-moments for Weibull.

| P<br>[%] | a        | b          | c           | d            | e            | f             | g             | h             | i            |
|----------|----------|------------|-------------|--------------|--------------|---------------|---------------|---------------|--------------|
| 0.01     | 10.38815 | -337.16546 | 7056.29489  | -62596.82183 | 292870.50322 | -769929.64519 | 1147108.66145 | -904666.66322 | 294517.97591 |
| 0.1      | 2.96147  | 107.40737  | -1912.50408 | 16999.23656  | -78064.02343 | 200931.07591  | -290664.39863 | 220564.61486  | -68045.52714 |
| 0.5      | 3.37977  | 31.60723   | -483.30612  | 4422.33779   | -20715.47605 | 54607.16373   | -81196.16570  | 63620.63386   | -20418.09920 |
| 1        | 3.29504  | 12.11788   | -124.71392  | 1204.55002   | -5772.34918  | 15642.79909   | -23975.41219  | 19419.50988   | -6477.14385  |
| 2        | 2.99597  | 3.20856    | 22.71873    | -152.83087   | 623.30827    | -1331.53779   | 1434.29003    | -631.13514    | 4.95780      |
| 3        | 2.73864  | 1.26748    | 42.95589    | -358.62125   | 1632.50399   | -4142.06642   | 5852.88538    | -4299.90165   | 1258.75634   |
| 5        | 2.34263  | 0.53052    | 33.34481    | -298.80902   | 1399.47710   | -3691.49466   | 5450.72462    | -4218.05402   | 1321.36770   |
| 10       | 1.67937  | 0.22396    | 5.31829     | -68.36718    | 344.01600    | -1000.07004   | 1611.60205    | -1355.15527   | 461.98724    |
| 20       | 0.80909  | -0.79607   | -6.57644    | 37.09428     | -158.96448   | 363.78771     | -456.03659    | 293.23996     | -73.22732    |
| 40       | -0.51427 | -1.95635   | -1.62576    | 13.09331     | -55.69512    | 149.55344     | -221.15070    | 171.28892     | -54.49616    |
| 50       | -1.15696 | -1.86177   | 1.02431     | 1.69090      | -5.14088     | 25.34311      | -54.53871     | 53.27819      | -20.12289    |
| 80       | -3.68218 | 2.88032    | 4.31108     | -17.49187    | 53.53072     | -116.81199    | 139.84852     | -81.71878     | 17.72063     |
| 90       | -5.27968 | 9.47245    | -3.21088    | -20.99956    | 68.28625     | -134.06287    | 158.19358     | -96.53724     | 22.73513     |

### The variation diagram for L and LH-moments

In Figure S1 are presented the curves for L-kurtosis and L-skewness.

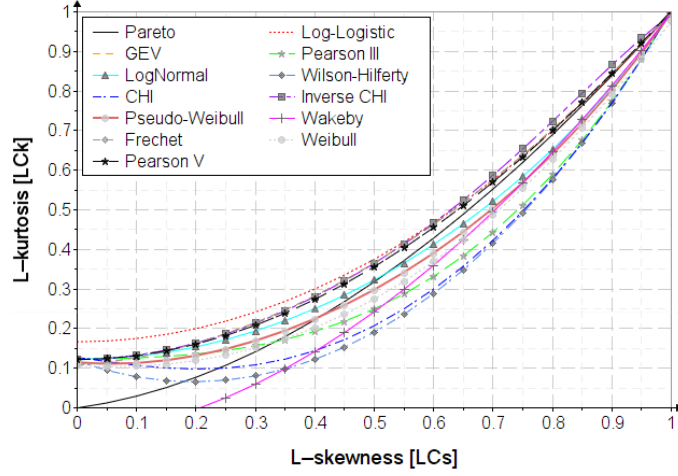

**Figure S1.** The L-skewness and L-kurtosis variation.

Pearson III:

$$\tau_4 = 0.1217175 + 0.030285 \cdot \tau_3 + 0.0266125 \cdot \tau_3^2 + 0.8774691 \cdot \tau_3^3 - 0.0564795 \cdot \tau_3^4$$

Pearson V:

$$\tau_4 = 0.1089545 - 0.1542626 \cdot \tau_3 + 1.0657605 \cdot \tau_3^2 - 0.3521005 \cdot \tau_3^3 + 0.3269967 \cdot \tau_3^4$$

Wilson-Hilferty:

$$\tau_4 = 0.1177849 - 0.5367173 \cdot \tau_3 + 1.4180786 \cdot \tau_3^2 - 0.2084697 \cdot \tau_3^3 + 0.2098975 \cdot \tau_3^4$$

CHI:

$$\tau_4 = 0.1274475 - 0.2174617 \cdot \tau_3 - 0.0945508 \cdot \tau_3^2 + 2.6572905 \cdot \tau_3^3 - 2.369862 \cdot \tau_3^4 + 0.9016064 \cdot \tau_3^5$$

ICH:

$$\tau_4 = 0.1215494 + 0.0260015 \cdot \tau_3 + 0.6839989 \cdot \tau_3^2 + 2.3432188 \cdot \tau_3^3 - 7.9178585 \cdot \tau_3^4 + 11.9165941 \cdot \tau_3^5 - 8.06007 \cdot \tau_3^6 + 1.8820702 \cdot \tau_3^7$$

Pseudo-Weibull:

$$\tau_4 = 0.1132189 - 0.1242052 \cdot \tau_3 + 1.1329458 \cdot \tau_3^2 - 0.4716246 \cdot \tau_3^3 + 0.3449906 \cdot \tau_3^4$$

Wakeby:

$$\tau_4 = -0.07347 + 0.14443 \cdot \tau_3 + 1.03879 \cdot \tau_3^2 - 0.14602 \cdot \tau_3^3 + 0.03357 \cdot \tau_3^4$$

Pareto:

$$\tau_4 = -0.0003668 + 0.2070484 \cdot \tau_3 + 0.9264 \cdot \tau_3^2 - 0.133564 \cdot \tau_3^3$$

GEV:

$$\tau_4 = 0.1072214 + 0.1143838 \cdot \tau_3 + 0.8341466 \cdot \tau_3^2 - 0.0632425 \cdot \tau_3^3 + 0.0074607 \cdot \tau_3^4$$

Frechet:

$$\tau_4 = 0.1069938 + 0.1155235 \cdot \tau_3 + 0.8294258 \cdot \tau_3^2 - 0.0528083 \cdot \tau_3^3$$

Weibull:

$$\tau_4 = 0.1057425 - 0.0753465 \cdot \tau_3 + 0.6176919 \cdot \tau_3^2 + 0.5065127 \cdot \tau_3^3 - 0.1788008 \cdot \tau_3^4$$

Log-normal:

$$\tau_4 = 0.1238145 - 0.032954 \cdot \tau_3 + 0.9783895 \cdot \tau_3^2 - 0.3929245 \cdot \tau_3^3 + 0.3174611 \cdot \tau_3^4$$

Log-logistic: 
$$\tau_4 = \frac{1 + 5 \cdot \tau_3^2}{6} \approx 0.16667 + 0.83333 \cdot \tau_3^2$$

In Figure S2 are presented the variation of LH-skewness and LH-kurtosis.

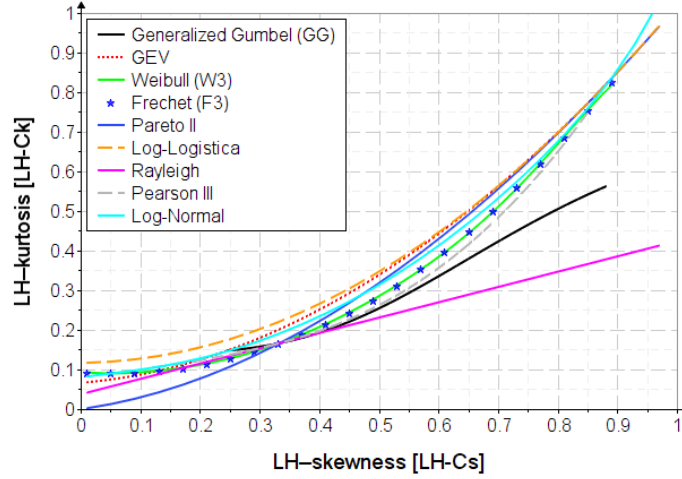

**Figure S2.** The variation diagram for LH-skewness and LH-kurtosis.

Pearson III:

$$\tau_{H4} = 0.1012322 - 0.2437927 \cdot \tau_{H3} + 3.5538482 \cdot \tau_{H3}^2 - 13.8996553 \cdot \tau_{H3}^3 + 31.3422272 \cdot \tau_{H3}^4 - 35.5781144 \cdot \tau_{H3}^5 + 20.677076 \cdot \tau_{H3}^6 - 4.8315272 \cdot \tau_{H3}^7$$

Log-normal:

$$\tau_{H4} = 0.0801496 + 0.2283728 \cdot \tau_{H3} - 0.9987353 \cdot \tau_{H3}^2 + 8.8369201 \cdot \tau_{H3}^3 - 24.2488462 \cdot \tau_{H3}^4 + 37.7635295 \cdot \tau_{H3}^5 - 30.6596349 \cdot \tau_{H3}^6 + 10.1236239 \cdot \tau_{H3}^7$$

GEV:

$$\tau_{H4} = 0.066585 + 0.1207821 \cdot \tau_{H3} + 0.8711194 \cdot \tau_{H3}^2 - 0.0456666 \cdot \tau_{H3}^3 - 0.0033066 \cdot \tau_{H3}^4 + 0.0170713 \cdot \tau_{H3}^5 - 0.0094267 \cdot \tau_{H3}^6 + 0.0009899 \cdot \tau_{H3}^7$$

Weibull:

$$\tau_{H4} = 0.0940624 - 0.167248 \cdot \tau_{H3} + 2.2686976 \cdot \tau_{H3}^2 - 9.8557774 \cdot \tau_{H3}^3 + 35.7330334 \cdot \tau_{H3}^4 - 66.7529615 \cdot \tau_{H3}^5 + 61.9426076 \cdot \tau_{H3}^6 - 22.3935866 \cdot \tau_{H3}^7$$

Rayleigh:

$$\tau_{H4} = \frac{7 \cdot (\sqrt{10} + 4 - 5 \cdot \sqrt{2}) \cdot (3 \cdot \tau_{H3} - 1)}{30 \cdot \sqrt{6} - 10 \cdot \sqrt{2} - 60} + \frac{99 \cdot \tau_{H3} - 28}{30}$$

Log-logistic:

$$\tau_{H4} = \frac{170 \cdot \tau_{H3}^2 + 36 \cdot \tau_{H3} + 224}{1920}$$

Fréchet:

$$\tau_{H4} = 0.0903692 + 0.0382575 \cdot \tau_{H3} - 0.9531845 \cdot \tau_{H3}^2 + 11.6781608 \cdot \tau_{H3}^3 - 35.9472026 \cdot \tau_{H3}^4 + 57.6701516 \cdot \tau_{H3}^5 - 45.5569267 \cdot \tau_{H3}^6 + 14.0532691 \cdot \tau_{H3}^7$$

Kappa (generalized Gumbel, Jeong 2009):

$$\tau_{H4} = 0.2623693 - 1.8726094 \cdot \tau_{H3} + 12.2859097 \cdot \tau_{H3}^2 - 45.0169093 \cdot \tau_{H3}^3 + 100.4606818 \cdot \tau_{H3}^4 - 122.9124059 \cdot \tau_{H3}^5 + 76.5421309 \cdot \tau_{H3}^6 - 19.1260088 \cdot \tau_{H3}^7$$
